# Supplementary material for: Comparative transcriptome and metabolome analysis suggests bottlenecks that limit seed and oil yields in transgenic Camelina sativa expressing diacylglycerol acyltransferase 1 and glycerol-3-phosphate dehydrogenase
Source: Biotechnol Biofuels. 2018 Dec 19;11:335. doi: 10.1186/s13068-018-1326-2 (PMC6299664; doi:10.1186/s13068-018-1326-2)
Supplement: Supplementary file 12 — Additional file 12: Table S18. Relative metabolite content during seed development in Camelina genotype relative to WT as a control. [file 13068_2018_1326_MOESM12_ESM.xlsx]

## Sheet: Metabolite content
Table S18. Relative metabolite content during seed development in Camelina genotype relative to WT as a control. Data are presented as metabolite ratio and P-values.
	GPD1-16 / WT-16		GPD1-26 / WT-26		GPD1-36 / WT-36		DGAT1-16 / WT-16		DGAT1-26 / WT-26		DGAT1-36 / WT-36		D+G-16 / WT-16		D+G-26 / WT-26		D+G-36 / WT-36
Metabolite	Ratio	P-value	Ratio	P-value	Ratio	P-value	Ratio	P-value	Ratio	P-value	Ratio	P-value	Ratio	P-value	Ratio	P-value	Ratio	P-value
Amino acid
betaine	1.07	0.381	1.15	0.118	1.36	0.0005	1.38	0.0004	0.96	0.6218	1.17	0.0721	1.29	0.0051	1.08	0.372	1.14	0.1004
cysteine	1.13	0.1744	1.57	7.8429e-06	0.97	0.7294	1.26	0.0079	1.08	0.338	0.88	0.1258	1.46	6.2992e-05	1.25	0.0117	1.01	0.87
glycine	1.16	0.0223	1.37	2.8223e-05	0.91	0.1576	1	0.995	1.27	0.0009	0.88	0.0539	0.98	0.8449	1.62	1.384e-08	0.95	0.4621
N-acetylserine	1.42	0.0004	2.11	9.7662e-10	0.92	0.3692	0.79	0.0189	0.96	0.7484	0.88	0.1322	1.41	0.0006	2.25	1.6354e-10	1.11	0.2753
O-acetylserine	1.46	0.0201	1.41	0.0346	0.52	0.0002	0.84	0.2674	0.92	0.51	0.67	0.0174	1.79	0.0005	2.12	2.2947e-05	0.61	0.0026
serine	1.08	0.158	1.35	3.732e-06	0.96	0.4647	1.14	0.0189	1.27	8.4478e-05	1.01	0.847	1.11	0.0547	1.48	1.9199e-08	0.99	0.8084
S-methylmethionine	0.9	0.336	0.79	0.0262	1.09	0.3672	1.02	0.8272	1.01	0.983	1.01	0.789	0.89	0.2824	1.09	0.3868	1.39	0.002
S-methylcysteine	1.41	0.0704	0.64	0.1246	1	1	1.82	0.0042	0.89	0.8818	1.25	0.4507	3.43	1.1112e-06	0.53	0.0307	1	1
2-oxindole-3-acetate	1.09	0.1509	0.99	0.8116	0.82	0.0061	1.06	0.2801	1.03	0.6629	1.06	0.3043	0.97	0.7528	1.1	0.1429	0.89	0.0866
kynurenate	1.48	6.75e-05	1.36	0.0009	1.18	0.0553	2.24	4.2862e-11	1.43	0.0002	1.15	0.1067	1.58	1.7217e-05	1.28	0.0059	1.22	0.021
methyl indole-3-acetate	1.14	0.3132	1.01	0.9586	0.5	7.6314e-06	1.76	0.0002	1.16	0.283	1.29	0.0626	1.1	0.4339	1.16	0.2981	1.1	0.7682
phenylalanine	1.24	6.7235e-05	1.21	0.0004	0.96	0.3784	1.07	0.1647	1.07	0.186	0.97	0.4884	1.23	0.0001	1.2	0.0005	0.98	0.6712
quinate	1.08	0.2418	1.4	1.2202e-05	1.42	6.194e-06	1.01	0.9046	1.1	0.1333	1.13	0.1045	1.22	0.0043	1.25	0.0018	1.05	0.49
tryptophan	1.29	1.6615e-05	1.42	9.8323e-08	1.33	3.0459e-06	0.98	0.8346	1.1	0.0861	1.11	0.0486	1.02	0.6071	1.26	0.0001	1.21	0.0008
tyrosine	1.24	3.2225e-05	1.17	0.0015	0.93	0.1112	1.1	0.0533	1.1	0.0551	0.95	0.2375	1.27	6.0447e-06	1.25	2.1798e-05	0.98	0.6823
2-aminoadipate	1.21	0.0567	1.38	0.0013	0.92	0.3991	1.27	0.0196	1.48	0.0002	1.11	0.3097	1.34	0.0037	1.87	1.5203e-07	0.89	0.1708
alanine	1.1	0.1109	1.25	0.0004	0.98	0.756	1.07	0.2263	1.13	0.0367	0.97	0.6899	1.08	0.1585	1.48	8.0737e-08	1.01	0.8537
asparagine	0.76	0.0291	1.34	0.0118	1.29	0.0438	0.88	0.2726	1.48	0.0012	0.8	0.0764	1.08	0.5489	1.69	4.4628e-05	1.54	0.0015
aspartate	1.22	0.0343	1.21	0.1017	1.42	0.0036	1.35	0.0029	1.18	0.151	0.94	0.5774	1.27	0.012	1.21	0.1123	1.06	0.5747
homoserine	1.18	0.2079	1.46	0.0069	0.69	0.0075	0.81	0.1179	1.14	0.3041	0.76	0.042	1.18	0.2119	1.68	0.0003	0.72	0.0187
lysine	1.03	0.7069	1.62	1.4571e-07	1.16	0.052	1.17	0.0392	1.27	0.0019	1.01	0.8658	1.24	0.0076	1.64	1.1332e-07	1.5	5.8173e-06
methionine	1.05	0.3645	1.02	0.7479	0.92	0.0956	1.11	0.0405	1.01	0.8291	0.98	0.7411	1.06	0.254	1.11	0.0338	0.97	0.5043
N-acetylmethionine	1.08	0.4949	0.99	0.8337	0.88	0.3356	1.24	0.0607	0.96	0.7276	0.92	0.4173	1.3	0.0165	1.11	0.309	0.97	0.9106
pipecolate	1.05	0.5357	0.97	0.6815	1	0.9854	0.92	0.264	1.08	0.3022	1.09	0.4453	1.06	0.4512	1.08	0.3233	0.91	0.231
S-adenosylhomocysteine (SAH)	1.01	0.651	1.46	4.0347e-05	1	1	1.09	0.1872	1.16	0.0734	1.02	0.8504	1.07	0.303	1.29	0.0036	1	1
threonine	1.22	1.0043e-07	1.06	0.051	0.95	0.1365	1.43	5.8e-14	1.17	8.4632e-06	0.94	0.0637	1.19	1.5034e-06	1.11	0.0009	0.98	0.4983
2-aminobutyrate	1.15	0.2504	1.25	0.0486	1.65	6.0669e-05	1	0.8664	1.22	0.0977	1.38	0.0057	1.12	0.2749	1.49	0.0008	1.69	3.307e-05
4-acetamidobutanoate	0.84	0.6033	1.07	0.784	1.49	0.2394	0.52	0.0224	1.41	0.1334	1.36	0.4191	0.94	0.8742	2.08	0.0077	1.09	0.815
arginine	1.02	0.7922	1.52	1.6669e-07	1.06	0.346	0.94	0.3373	0.87	0.0329	0.59	6.925e-10	0.84	0.0112	1.23	0.0021	2.04	2.64e-13
argininosuccinate	0.77	0.6574	3.01	0.0729	1.4	0.1422	0.59	0.4094	0.65	0.4843	0.92	0.7923	1.1	0.8845	1.28	0.9516	1.56	0.3023
citrulline	1.09	0.0191	1.13	0.0017	0.67	8.7e-13	1.33	3.6445e-09	1.12	0.0039	1.04	0.3556	1.23	2.7987e-06	1.15	0.0005	1	0.9721
gamma-aminobutyrate (GABA)	0.82	0.1047	1.04	0.6652	1.06	0.6089	0.74	0.0187	1.17	0.2111	1.25	0.0762	1.12	0.2952	1.69	7.7467e-05	0.97	0.8536
glutamate	1.13	0.0427	1.31	0.0001	1.22	0.0034	1.16	0.0171	1.18	0.0136	1.04	0.5937	1.13	0.0405	1.23	0.0025	1.03	0.6522
glutamine	0.99	0.8469	1.17	2.1342e-05	0.71	1.746e-12	0.98	0.6379	0.9	0.0028	0.9	0.0017	1.14	0.0003	1.31	6.4046e-10	1.13	0.0004
histidine	1.07	0.1195	0.92	0.0544	1.06	0.2306	1.08	0.0855	1.1	0.0399	1.07	0.1556	1.23	4.4859e-05	1.26	8.918e-06	1.11	0.0205
ornithine	0.85	0.4665	1.79	0.0245	1.48	0.2391	1	0.7856	0.81	0.8776	0.87	0.553	1.39	0.2852	1.47	0.1423	1.48	0.1833
proline	1.01	0.8286	1.25	1.6897e-06	1.03	0.5043	0.81	3.2944e-06	1.02	0.6394	0.99	0.8386	0.97	0.4274	1.2	3.454e-05	0.83	4.0383e-05
trans-4-hydroxyproline	0.94	0.4069	1.42	2.0497e-05	0.9	0.1589	0.75	0.0004	1.15	0.0524	0.9	0.0868	1.1	0.1871	2.43	1.8e-14	2.64	1e-15
urea	0.94	0.8465	0.79	0.197	0.47	0.0001	0.51	0.0003	1.04	0.8285	0.4	1.3184e-05	0.52	0.0011	0.55	0.0022	0.35	8.974e-07
4-hydroxy-2-oxoglutaric acid	1.05	0.7443	1.32	0.0943	1.19	0.28	0.94	0.7803	1.06	0.6181	1.17	0.3264	0.97	0.5671	1.24	0.1865	0.97	0.8917
4-guanidinobutanoate	0.99	0.8854	1.22	0.0056	1.69	2.3324e-09	0.71	2.9253e-05	0.97	0.6058	0.93	0.2719	0.89	0.1525	1.21	0.0072	1.57	6.2046e-08
isoleucine	1.06	0.2217	1.14	0.0151	1.02	0.6976	1.08	0.1236	1.11	0.05	0.91	0.0788	1.06	0.2148	1.25	8.678e-05	1.05	0.3404
3-methyl-2-oxovalerate	1.29	0.1469	2.25	0.0001	1.19	0.4479	1.31	0.1297	1.92	0.0038	1.41	0.1151	1.05	0.7211	2.62	1.0036e-05	1.04	0.8517
4-methyl-2-oxopentanoate	1.28	0.3233	1.23	0.4457	1.16	0.3847	1.01	0.9852	1.14	0.635	1.01	0.8585	0.87	0.5818	1.53	0.0461	0.98	0.9556
leucine	1.09	0.0794	1.07	0.2006	0.95	0.3097	1.17	0.0021	1.11	0.044	0.92	0.0976	1.11	0.0338	1.24	7.8928e-05	0.99	0.903
valine	1.07	0.083	1.12	0.0107	1.03	0.5151	1.08	0.065	1.08	0.0853	0.94	0.125	1.11	0.0124	1.26	3.075e-06	1.05	0.2411
5-methylthioadenosine (MTA)	0.95	0.689	1.01	0.851	0.93	0.5314	0.85	0.1954	1.17	0.1757	1.21	0.1617	1.08	0.449	0.98	0.9714	0.98	0.8308
agmatine	0.86	0.3544	1.36	0.0212	1.12	0.4509	0.37	2.7956e-06	1.02	0.614	0.64	0.0211	1.1	0.6558	1.74	0.0005	3.36	3.67e-08
putrescine	0.65	0.0036	1.17	0.1925	1.33	0.0357	0.44	7.7078e-07	0.7	0.0136	1.03	0.734	1.2	0.1926	1.03	0.8535	1.85	9.7152e-05
spermidine	0.84	0.4147	1.2	0.2152	1.13	0.4892	0.84	0.4147	0.93	0.7141	1.08	0.6732	0.84	0.4147	0.72	0.045	0.93	0.6826
5-oxoproline	0.91	0.0665	1.32	5.727e-06	0.87	0.0112	0.96	0.5088	1	0.9366	1.04	0.4982	1.08	0.1247	1.59	1.1136e-10	1.24	0.0002
glutathione, oxidized (GSSG)	1.25	0.0502	0.78	0.0767	1.2	0.2131	1.6	0.0006	1.13	0.4323	0.98	0.8567	1.26	0.0342	0.82	0.1799	0.85	0.2684
ophthalmate	1.11	0.0856	2.42	1e-15	0.86	0.0273	1.09	0.1797	0.92	0.1782	0.7	3.0595e-06	1.06	0.3437	1.5	3.4243e-07	1.54	7.273e-08
norophthalmate*	1.29	0.0232	3.1	1.158e-12	0.6	3.093e-05	1.21	0.0781	0.86	0.1573	0.53	4.5376e-07	1.1	0.3794	1.82	2.1632e-06	1.2	0.0824
Carbohydrate
1,3-dihydroxyacetone	0.99	0.9178	1.13	0.4387	0.89	0.6506	1.02	0.926	0.87	0.6622	1.55	0.039	1.36	0.1964	0.98	0.864	0.95	0.8414
glucose	0.89	0.0361	0.97	0.6313	0.94	0.2805	1.04	0.4616	1.17	0.0047	1.17	0.0065	1.08	0.1733	1.27	8.7104e-05	0.93	0.1855
glucose-6-phosphate (G6P)	0.92	0.6238	1.31	0.0174	1.04	0.7149	0.98	0.8696	1.09	0.4201	1.15	0.2094	1.08	0.3203	1.15	0.204	1.12	0.3333
glycerate	1.03	0.7615	1.04	0.6012	1.06	0.4658	1.16	0.067	1.16	0.057	1.17	0.0428	1.13	0.1259	1.31	0.0011	1.07	0.4236
pyruvate	1.03	0.7869	1.19	0.111	1.05	0.6893	0.87	0.2072	1.09	0.3925	1.24	0.0431	1.07	0.5309	1.47	0.001	1.19	0.1221
alpha-ketoglutarate	1.09	0.7597	1.43	0.1169	1.1	0.6114	0.77	0.3628	1.22	0.3329	1.22	0.3836	0.7	0.0235	1.19	0.3276	1.23	0.4037
citrate	1.18	0.0048	1.35	4.0801e-06	1.06	0.3001	1.12	0.0376	1.24	0.0005	0.98	0.7316	1.31	2.2297e-05	1.28	8.6757e-05	0.87	0.023
fumarate	1.12	0.335	1.06	0.5721	0.77	0.0238	1.29	0.0379	1.17	0.2042	0.91	0.3947	1.34	0.0341	1.12	0.3071	1.11	0.4031
malate	1.11	0.066	1.28	0.0001	1.09	0.1233	1.32	2.0674e-05	1.26	0.0002	0.99	0.9136	1.36	2.7236e-06	1.25	0.0003	1.01	0.7429
oxaloacetate	1.06	0.8542	1.17	0.5464	3.12	0.0017	1.57	0.2551	1.03	0.9103	2.15	0.0418	2.24	0.0402	1.49	0.1284	1.18	0.6924
succinate	1.48	1.4408e-05	1.12	0.156	0.72	0.0002	1.33	0.0008	1.23	0.0137	0.71	0.0001	1.35	0.0003	1.12	0.1353	0.66	3.9008e-06
arabinose	0.83	0.1045	1	0.9846	0.82	0.0585	1.12	0.3291	1.13	0.2817	1.06	0.8036	0.96	0.7188	1.27	0.0618	1.04	0.8055
arabitol	1.01	0.8942	1.35	0.0549	0.65	0.0087	0.89	0.5399	0.99	0.906	1.14	0.4126	1.39	0.0315	1.22	0.1967	1.01	0.8687
arabonate	1.18	0.0839	1.06	0.4946	1.13	0.2504	1.23	0.0313	1.08	0.3605	1.02	0.8543	1.08	0.471	1.08	0.4137	1.19	0.0893
erythritol	1.25	0.3077	1.56	0.0463	0.36	2.1152e-05	1.11	0.6134	1.05	0.7886	0.71	0.0143	1.13	0.5876	1.26	0.2883	0.79	0.2012
erythronate*	1.08	0.6355	0.86	0.1912	0.63	0.0018	1.15	0.3411	1.06	0.6677	0.64	0.0025	1.15	0.3444	1.11	0.4232	0.57	0.0003
gluconate	1.02	0.8505	1.28	0.033	0.97	0.7718	1.24	0.0302	1.33	0.0132	0.81	0.0608	1.33	0.0067	1.45	0.0013	1.13	0.2627
N-acetylglucosamine	0.99	0.9308	1.38	0.0148	1.23	0.136	1.29	0.0499	1.18	0.1841	1.27	0.0756	1.35	0.0281	1.44	0.0066	1.29	0.0589
ribose	0.84	0.082	1.05	0.5125	0.77	0.0079	0.8	0.0264	1.09	0.2688	0.94	0.5481	0.92	0.4439	1.17	0.0596	0.83	0.0528
xylonate	1.12	0.0889	1.03	0.6488	1	0.9581	1.13	0.0605	1.11	0.0926	0.99	0.8649	1.15	0.0355	1.12	0.089	0.93	0.2773
inositol 1-phosphate (I1P)	1.24	0.0235	1.21	0.0361	0.9	0.2417	1.93	8.7378e-09	1.06	0.4767	1.24	0.0162	1.31	0.0057	1.1	0.266	1.06	0.4952
myo-inositol	1.04	0.4768	1.27	3.9976e-05	1.04	0.4032	1.18	0.0024	1.07	0.1553	1.11	0.0439	1.17	0.0037	1.22	0.0003	1	0.9899
myo-inositol pentakisphosphate (1,2,4,5,6 or 1,3,4,5,6)	1	1	1.13	0.3638	1.12	0.4595	1.63	0.0088	0.89	0.3815	1.16	0.3434	1	1	0.81	0.1186	1.05	0.728
myo-inositol hexakisphosphate	1.07	0.8396	1.15	0.7337	1.12	0.7757	3.75	0.009	0.88	0.7167	1.1	0.8071	1.32	0.6216	0.73	0.3894	1.06	0.8804
myo-inositol triphosphate (1,4,5 or 1,3,4)	1	1	1	0.973	1.12	0.3628	1	1	1.02	0.9095	1.19	0.1708	1	1	0.86	0.1637	1.1	0.4424
myo-inositol tetrakisphosphate (1,3,4,6 or 3,4,5,6 or 1,3,4,5)	1	1	1.08	0.4404	1.06	0.6017	1	1	0.92	0.3295	1.15	0.2281	1	1	0.81	0.0387	1.06	0.6283
3-deoxyoctulosonate	0.91	0.3451	1.05	0.586	0.94	0.5429	1.02	0.9321	1.2	0.1062	1.21	0.1128	1.07	0.5544	1.2	0.1313	1.1	0.625
fructose	0.87	0.1484	1.12	0.22	0.97	0.6636	0.95	0.5987	1.15	0.1419	1.19	0.0967	1.16	0.1166	1.47	0.0002	0.98	0.8406
galactinol	2.29	1.2921e-07	2.32	9.5868e-08	0.82	0.124	3.2	1.2554e-10	1.47	0.0045	0.99	0.8324	1.78	7.5336e-05	2.07	1.9307e-06	1.13	0.3469
galacturonate	0.82	0.0329	1	0.9391	0.99	0.8984	1.12	0.1958	1.23	0.0197	1.02	0.7716	1.49	5.8677e-05	1.11	0.1824	0.97	0.6912
maltose	1.05	0.7787	1.28	0.2034	0.97	0.8171	0.75	0.106	1.13	0.5122	0.97	0.5077	0.82	0.2624	1.42	0.061	0.78	0.2418
mannitol	1.08	0.5064	1.16	0.1301	0.99	0.84	1.37	0.0026	1.03	0.7111	1.18	0.0988	1.01	0.8486	1.15	0.1656	1.05	0.7383
mannose	0.98	0.6788	1.03	0.5871	0.94	0.2772	1.19	0.0057	1.13	0.0433	1.13	0.0445	1.1	0.106	1.16	0.0217	0.98	0.7161
mannose-6-phosphate	0.96	0.7029	1.19	0.0949	0.85	0.168	1.15	0.2392	1.14	0.1671	1.13	0.3401	1.14	0.28	1.13	0.204	1.01	0.9903
raffinose	1.65	0.0046	1.17	0.3889	1.04	0.8281	15.4	0	1.09	0.6569	1.01	0.9472	12.6	0	1.06	0.7533	1.01	0.9461
sorbitol	0.87	0.4208	0.66	0.03	0.88	0.5386	0.87	0.318	0.93	0.7923	0.95	0.838	1.12	0.5184	0.98	0.9808	0.89	0.3821
stachyose	1	1	1.02	0.8895	0.97	0.829	1.58	0.0028	1.02	0.8971	0.98	0.9092	2.85	2.7199e-07	1.01	0.9312	1.07	0.6417
sucrose	1.11	0.0002	1.15	1.1011e-06	1.08	0.0029	1.14	5.6034e-06	1.02	0.4468	1.01	0.6625	1.09	0.0011	1.01	0.7965	0.99	0.5876
Lipids
10-heptadecenoate (17:1n7)	1.23	0.1678	0.86	0.3627	1.01	0.8657	1.26	0.1228	1.09	0.6121	1.14	0.4348	1.39	0.0534	0.96	0.6201	1.15	0.3092
2-hydroxyglutarate	1.31	0.1115	0.9	0.6215	0.94	0.8284	1.03	0.9106	1.19	0.275	0.95	0.811	1.37	0.0672	1.28	0.1124	0.7	0.0653
2-hydroxypalmitate	0.77	0.095	0.67	0.0461	1.15	0.4184	1.43	0.086	0.84	0.2592	1.06	0.6741	1.35	0.1582	0.8	0.2696	1.33	0.1514
2-hydroxystearate	1.05	0.8473	0.77	0.2812	1.35	0.1169	1.56	0.0987	0.92	0.4403	1.04	0.5453	1.25	0.4704	0.75	0.2652	1.37	0.1497
8-hydroxyoctanoate	0.84	0.1211	0.88	0.2595	1	1	1.09	0.4697	1.03	0.864	1	1	0.98	0.951	1.1	0.4172	1	1
arachidate (20:0)	1.24	0.2594	0.71	0.0979	1.34	0.1314	1.77	0.006	1.07	0.7343	1.72	0.2287	1.35	0.1308	1.18	0.4175	1.17	0.4067
azelate (nonanedioate)	0.52	0.0003	0.47	9.8556e-06	1.11	0.4867	0.59	0.005	0.48	1.0601e-05	1.1	0.555	0.48	9.1177e-05	0.52	6.6493e-05	1.16	0.3064
cis-vaccenate (18:1n7)	1.07	0.6758	0.76	0.0916	1.09	0.6183	0.97	0.7993	1.04	0.7833	1.38	0.1279	1.05	0.7745	1.24	0.2214	0.91	0.6265
dihomo-linoleate (20:2n6)	1.58	0.1113	0.58	0.1127	0.93	0.7584	3.28	0.0002	0.98	0.9209	1.37	0.4484	2.86	0.0018	0.75	0.286	1.23	0.4591
dihomo-linolenate (20:3n3 or n6)	1.63	0.0433	0.63	0.0734	0.86	0.607	5.06	3.0288e-08	0.93	0.7415	1.37	0.3675	4.75	2.1071e-07	0.77	0.2005	1.04	0.7354
docosadienoate (22:2n6)	1.59	0.0838	0.47	0.0185	0.94	0.8296	5.42	4.3849e-07	0.99	0.93	1.42	0.428	5.21	2.6671e-06	0.69	0.1808	1.33	0.2959
docosatrienoate (22:3n3)	1.43	0.2525	0.54	0.0443	0.84	0.5309	5.21	4.5023e-07	0.94	0.8546	1.27	0.6381	4.99	1.9873e-06	0.69	0.197	1.05	0.7743
eicosenoate (20:1n9 or 11)	1.37	0.3246	0.58	0.1775	0.99	0.9918	2.34	0.0125	0.94	0.9766	1.39	0.4083	2.19	0.0468	0.71	0.2731	1.36	0.2845
erucate (22:1n9)	1.49	0.1798	0.54	0.0786	1.08	0.8213	3.63	8.4282e-05	0.96	0.9695	1.58	0.2531	3.23	0.0012	0.71	0.2355	1.46	0.1936
lignocerate (24:0)	1.13	0.3567	0.74	0.0252	0.71	0.008	1.82	3.6504e-05	1.21	0.1264	0.98	0.8534	1.51	0.0023	1.07	0.5615	0.76	0.0497
linoleate (18:2n6)	1.1	0.6477	0.69	0.0735	1.11	0.5669	1.09	0.6906	1.1	0.6943	1.43	0.2802	1.16	0.4958	0.96	0.8332	1.13	0.5169
linolenate [alpha or gamma; (18:3n3 or 6)]	1.35	0.0383	0.71	0.0217	1.03	0.7867	1.86	7.998e-05	0.97	0.8422	1.49	0.0481	1.69	0.0007	0.96	0.7688	1.07	0.5899
nervonate (24:1n9)	1.51	0.038	0.81	0.3178	0.63	0.0255	3.13	1.3442e-06	1.08	0.6905	1.23	0.9373	2.86	1.2207e-05	1.16	0.4541	1.08	0.6948
oleate (18:1n9)	1.09	0.5933	0.72	0.0633	0.92	0.6663	1.04	0.8228	1.08	0.6802	1.4	0.5626	1.06	0.6967	1.21	0.2646	1.12	0.467
palmitate (16:0)	1.17	0.295	0.72	0.0386	1.16	0.2644	1.29	0.092	1.12	0.4432	1.25	0.1694	1.38	0.0526	0.99	0.9227	1.15	0.2875
palmitoleate (16:1n7)	1.16	0.2552	0.79	0.0789	1.43	0.01	1.13	0.3746	1.04	0.7886	1.67	0.0016	1.2	0.1962	0.94	0.6465	1.48	0.005
stearate (18:0)	1.07	0.6796	0.76	0.2272	1.18	0.3839	1.22	0.2418	1.14	0.4	1.3	0.1404	1.37	0.1149	0.91	0.8017	1.11	0.4511
undecanedioate	0.33	6.9431e-07	0.56	0.004	1	1	0.28	7.699e-08	0.56	0.004	1	1	0.26	3.407e-08	0.56	0.004	1	1
9,10-DiHOME	1.26	0.3235	0.81	0.3638	0.78	0.3226	1.58	0.0588	1.09	0.749	1.91	0.6263	1.01	0.9541	1.18	0.4951	1.26	0.3535
9,10-epoxystearate	1.45	0.005	0.59	7.448e-05	1	1	1.32	0.0207	0.95	0.5639	1	1	1.03	0.7317	1.05	0.7455	1.1	0.4999
1-linoleoylglycerol (1-monolinolein)	1.37	0.2821	0.5	0.0571	0.79	0.4238	1.85	0.0416	1.12	0.5971	1.2	0.8565	1.55	0.2293	0.67	0.2098	1.45	0.1826
1-oleoylglycerol (1-monoolein)	0.6	0.1244	1.23	0.5624	0.76	0.5442	0.98	0.4044	2.08	0.1003	2.24	0.4358	1.12	0.2722	2.16	0.0833	1	0.9538
1-palmitoylglycerol (1-monopalmitin)	1.56	0.0413	0.87	0.526	0.66	0.0675	2.09	0.0013	1.17	0.4764	1.97	0.1333	1.36	0.1603	1.26	0.286	1.17	0.4822
1-stearoylglycerol (1-monostearin)	1.7	0.0167	0.78	0.2444	0.71	0.1309	1.85	0.0054	1.1	0.6534	1.63	0.4221	1.2	0.3398	1.18	0.4514	1.17	0.4531
1-stearoylglycerophosphoglycerol	0.76	0.0732	1.25	0.171	1.67	0.0016	0.88	0.4295	1.37	0.0448	0.88	0.3747	0.72	0.0412	0.9	0.5275	1.06	0.6989
2-linoleoylglycerol (2-monolinolein)	1.11	0.6072	0.63	0.2979	0.58	0.1984	1.47	0.1289	1.47	0.2193	0.68	0.3252	1.33	0.3458	0.8	0.5484	0.87	0.8251
2-oleoylglycerol (2-monoolein)	1.66	0.1293	1.4	0.0379	1.23	0.6255	1.75	0.0969	1.58	0.0206	2.34	0.0597	1.01	0.9847	1.75	0.0097	1.59	0.2009
2-palmitoylglycerol (2-monopalmitin)	1.31	0.2123	0.58	0.0914	1.52	0.2853	1.27	0.2875	1.09	0.6881	2.1	0.0777	1.19	0.383	0.84	0.6008	1.57	0.1386
monoeicosadienoin	0.64	0.3529	1.11	0.6441	0.84	0.7298	2.84	0.0043	1.39	0.3673	2.59	0.6269	2.48	0.0093	1.57	0.2679	0.93	0.8833
eicosenoylglycerol (monoeicosenoin)	1.97	0.0047	0.85	0.5026	0.58	0.0291	4.15	3.5937e-07	1.07	0.7689	1.66	0.4749	2.23	0.0014	1.13	0.6112	0.86	0.4442
1-dihomo-linolenyl-glycerol (1-monoeicosatrienoin)	0.93	0.8467	1.13	0.6331	1.09	0.9188	4.51	5.1229e-05	0.96	0.7153	1.97	0.3786	4.54	7.0765e-05	1.25	0.2993	0.98	0.97
1-linolenoylglycerol	1.32	0.2831	0.52	0.1023	1.73	0.1735	2.26	0.01	1	0.9827	1.06	0.8498	2.36	0.0122	0.71	0.4008	1.02	0.8252
glycerol	1.15	0.2775	0.74	0.0303	0.88	0.3634	1.34	0.0315	1.06	0.7047	1.4	0.123	1.27	0.0717	1.2	0.1894	1.05	0.7108
1-linoleoylglycerophosphoethanolamine*	1.51	0.1537	0.94	0.8584	0.92	0.474	1.12	0.7287	0.89	0.5272	0.56	0.3489	1.43	0.2409	0.6	0.0813	0.58	0.3271
1-oleoylglycerophosphoinositol*	0.91	0.9838	1.22	0.3274	1.07	0.7793	0.61	0.09	0.98	0.8176	0.94	0.9478	0.77	0.496	1.03	0.8638	1.19	0.3885
1-palmitoylglycerophosphocholine (16:0)	0.88	0.6172	1.26	0.4477	1.83	0.0182	0.81	0.5321	0.95	0.7272	1.06	0.4895	0.99	0.9547	0.65	0.1301	0.96	0.8767
1-palmitoylglycerophosphoethanolamine	1.03	0.9139	1.23	0.4646	1.71	0.0275	0.89	0.4872	0.96	0.6668	1.06	0.6215	1.1	0.6709	0.65	0.0703	1.03	0.8619
1-palmitoylglycerophosphoinositol*	0.61	0.0305	1.05	0.7296	1.5	0.0742	0.49	0.0051	1	0.8762	1.27	0.2546	0.87	0.5879	0.89	0.7457	1.27	0.3384
1-stearoylglycerophosphocholine (18:0)	0.75	0.2506	1.38	0.2181	1.11	0.6373	1.01	0.6311	1.11	0.6886	0.76	0.5129	1.19	0.3306	1.37	0.2258	1.05	0.96
2-palmitoylglycerophosphocholine*	1	1	1.38	0.0894	1.73	0.0055	1	1	0.92	0.8062	1.02	0.8864	1	1	0.89	0.6926	0.95	0.7711
2-palmitoylglycerophosphoethanolamine*	1	1	0.99	0.9156	1.1	0.1921	1	1	0.76	0.2298	0.94	0.555	1.13	0.6255	0.55	0.0205	0.63	0.3001
glycerol 3-phosphate (G3P)	1.1	0.3604	1.24	0.0571	0.96	0.7195	1.05	0.5856	0.99	0.9239	1.09	0.5919	1.2	0.0907	1.29	0.0329	1.04	0.6792
glycerophosphorylcholine (GPC)	0.86	0.354	1.3	0.1024	0.92	0.6667	1.18	0.2445	0.98	0.9338	0.81	0.0786	1.12	0.3888	1.08	0.5885	0.92	0.6722
phosphoethanolamine	1.07	0.7273	1.19	0.2479	1.55	0.0193	0.95	0.7728	1.55	0.0127	1.14	0.4715	0.78	0.2243	1.58	0.0068	1.78	0.0029
1-palmitoylglycerophosphoglycerol*	0.71	0.0931	0.8	0.3097	1.18	0.3065	1	0.8426	0.9	0.4614	1.11	0.4981	0.91	0.7112	0.77	0.1712	0.86	0.5285
choline phosphate	1.08	0.1076	1.05	0.3474	1.22	0.0003	1.19	0.0011	1.15	0.0056	1.05	0.3224	0.97	0.5084	1.14	0.0112	1.16	0.004
ethanolamine	0.88	0.2909	1.15	0.2816	1.18	0.1626	1.04	0.8465	1.05	0.6071	1.25	0.0696	1.19	0.185	1.56	0.002	0.93	0.5852
brassicasterol	1.1	0.535	1.36	0.0304	1.09	0.5103	1.55	0.0015	1.4	0.017	1.06	0.6787	1.06	0.5973	1.44	0.0111	1.04	0.8684
campesterol	1.19	0.1129	1.53	0.0004	1.23	0.0354	1.29	0.0239	1.35	0.0091	1.02	0.6475	1.16	0.2069	1.38	0.0057	1.11	0.2142
Cofactors, Prosthetic Groups, Electron Carriers
pantothenate	1.02	0.9153	1.14	0.1946	1.4	0.007	1.07	0.5888	1.17	0.1387	0.95	0.7092	0.9	0.4099	1.3	0.0201	1.01	0.965
nicotinamide	0.91	0.4007	0.88	0.3608	0.87	0.2069	1.14	0.4308	0.98	0.8291	1.09	0.4799	0.96	0.7421	1.16	0.2373	0.84	0.1703
nicotinamide adenine dinucleotide (NAD+)	1.43	0.021	1.11	0.5384	0.91	0.7125	1.45	0.015	1.32	0.1336	0.89	0.4781	1.25	0.1361	1.26	0.1861	0.99	0.9359
nicotinamide riboside*	1.12	0.3147	0.98	0.9145	0.94	0.612	1.22	0.1037	0.96	0.6375	0.91	0.3618	1	0.9779	1.06	0.5516	0.85	0.1776
nicotianamine	0.91	0.0075	0.95	0.1573	1.01	0.8333	1.12	0.0014	1.04	0.2187	1.06	0.0728	0.99	0.8277	0.9	0.0028	0.88	0.0007
nicotinate	1.33	0.0072	1.34	0.006	1.15	0.1459	1.92	1.0087e-07	1.08	0.4226	1.04	0.6635	1.41	0.0033	1.01	0.9035	1.01	0.8866
trigonelline (N'-methylnicotinate)	1.27	0.0053	1.12	0.1814	0.9	0.2343	1.13	0.1371	1.21	0.0268	1.01	0.6805	1.09	0.2784	1.26	0.0089	1.04	0.6699
p-aminobenzoate (PABA)	1.09	0.1626	1.07	0.3131	1.02	0.7685	1.17	0.0173	1.1	0.176	0.97	0.6639	1.12	0.0767	1.02	0.689	0.86	0.0282
methylphosphate	0.96	0.7124	1.29	0.0517	1.09	0.4448	1.31	0.0346	1.22	0.1245	1.07	0.5298	1.16	0.1783	1.35	0.0286	0.91	0.4942
phosphate	0.94	0.3161	1.02	0.7647	0.89	0.0486	1.11	0.0577	1.14	0.0267	1.14	0.0252	1.09	0.1289	1.28	0.0001	1.01	0.8753
flavin adenine dinucleotide (FAD)	1.1	0.5875	1.41	0.0619	0.98	0.8952	1.21	0.3226	1.32	0.1624	0.77	0.1087	1.13	0.4756	1.1	0.665	0.98	0.9424
flavin mononucleotide (FMN)	1.04	0.8569	1.23	0.2124	1.24	0.1891	1.19	0.3992	0.99	0.9657	1.35	0.073	0.94	0.5531	1.19	0.3631	0.95	0.816
ascorbate (Vitamin C)	0.97	0.9373	0.96	0.8546	1.2	0.4186	0.93	0.7755	0.84	0.323	1.23	0.2624	1.51	0.0259	1.1	0.6547	1.14	0.8067
dehydroascorbate	0.79	0.0008	1	0.9118	0.89	0.0969	0.94	0.3135	1.09	0.184	0.94	0.3502	1.08	0.2337	1.08	0.1851	0.89	0.09
glucarate (saccharate)	0.88	0.0759	1.17	0.0201	1.07	0.3078	1.18	0.0141	1.18	0.015	0.98	0.8178	1.17	0.0191	1.14	0.0513	1.12	0.0963
threonate	1.23	0.0693	1.04	0.6238	0.92	0.3444	1.45	0.0028	1.18	0.1482	0.84	0.1303	1.36	0.0084	1.23	0.0627	0.79	0.0282
alpha-tocopherol	0.52	0.4245	0.96	0.9303	1.01	0.9858	0.39	0.1456	1.12	0.4672	0.6	0.127	0.62	0.4965	1.33	0.3911	0.53	0.0743
gamma-tocopherol	2.11	4.3778e-07	1.29	0.0764	1.07	0.6321	3.63	5.507e-12	1.14	0.3552	1.03	0.8267	2.48	3.7942e-08	1.14	0.3538	0.98	0.9146
pyridoxal	0.79	0.2061	1.36	0.1369	0.98	0.9316	0.86	0.3541	1.16	0.4726	0.82	0.4014	0.9	0.5188	1.24	0.259	1.23	0.1523
pyridoxate	1.1	0.343	1.1	0.346	1.03	0.837	1.18	0.1213	1.23	0.0478	0.93	0.4342	1.09	0.4281	1.32	0.0126	0.87	0.1678
phytol	1.18	0.1793	1.07	0.5731	0.87	0.3132	1.55	0.0007	1.18	0.2439	1.02	0.852	1.11	0.4621	1.23	0.1031	0.82	0.1048
Nucleotide
adenine	0.69	0.2735	0.82	0.226	0.56	0.0011	0.53	0.0094	0.87	0.388	0.65	0.0083	0.58	0.0307	1.04	0.8185	0.43	6.2671e-06
adenosine	1.12	0.0128	1.16	0.0019	1	0.9571	1.23	2.1789e-05	1.12	0.0173	1.07	0.138	1.09	0.0427	1.13	0.008	1.02	0.6064
adenosine 5'-monophosphate (AMP)	1.09	0.4218	1.25	0.095	0.87	0.2631	0.94	0.7411	1.01	0.9527	0.99	0.914	1.19	0.1591	0.99	0.9596	0.95	0.7202
adenosine-2',3'-cyclic monophosphate	0.71	0.0042	1.28	0.0419	1.27	0.0634	0.8	0.0544	1.1	0.4863	1.04	0.7477	0.69	0.0018	1.29	0.0271	1.57	0.0002
allantoin	1.05	0.6975	0.98	0.8372	0.92	0.4275	2.42	2.8714e-11	1.15	0.1418	1.06	0.5425	2.21	7.8862e-10	1.12	0.2236	1.21	0.0494
guanine	1.01	0.9345	1.03	0.5949	1.03	0.7676	1.2	0.0145	1.15	0.0378	1.05	0.4681	1.13	0.0901	1.1	0.1513	0.99	0.8786
guanosine	1.19	0.0236	1.14	0.0889	0.97	0.6739	1.21	0.0152	1.07	0.3693	0.88	0.0982	1.14	0.0778	1.28	0.002	0.99	0.9617
guanosine-2',3'-cyclic monophosphate	0.66	0.0012	1.18	0.2005	1.04	0.7013	0.79	0.0702	1.1	0.4167	1	0.9446	0.7	0.0037	1.46	0.0035	1.25	0.0513
N1-methyladenosine	1.03	0.9124	0.97	0.7435	1.07	0.5633	1.17	0.1509	0.84	0.1043	1.04	0.8172	0.97	0.6962	1.15	0.2209	1.09	0.4373
cytidine	0.81	0.0176	0.84	0.0386	0.82	0.0253	1.47	1.8588e-05	1.28	0.004	0.81	0.0171	0.86	0.0968	1.21	0.022	0.71	0.0001
cytosine	1	1	1.32	0.4151	0.83	0.5275	2.56	0.0556	1.37	0.9848	1.02	0.976	2.12	0.1039	1.24	0.5803	1.2	0.589
uridine	0.99	0.8266	0.92	0.4047	0.96	0.6178	0.88	0.1531	1.11	0.2439	1.03	0.7926	1.03	0.7773	1.25	0.0149	0.99	0.8126
beta-alanine	0.98	0.9086	1.34	0.0571	1.1	0.3866	1.2	0.2954	1.12	0.4026	1.17	0.1845	1.35	0.0606	1.5	0.012	1.02	0.6345
Peptide
gamma-glutamylisoleucine*	1.16	0.2813	1.08	0.5671	1.3	0.0426	5.4	2e-15	1.34	0.0247	1.03	0.8435	6.17	1e-15	1.41	0.0097	1.11	0.3979
gamma-glutamylleucine	0.77	0.3845	0.97	0.8416	1.21	0.3067	0.89	0.7346	0.91	0.7406	1.01	0.8693	0.77	0.3845	0.79	0.2411	1.08	0.6187
gamma-glutamylmethionine	1.18	0.1387	0.79	0.0228	0.95	0.5932	2.77	2.969e-12	1.3	0.0123	1.12	0.2813	2.7	8.846e-12	1.13	0.2315	0.86	0.1458
gamma-glutamylphenylalanine	1.34	0.0406	1.09	0.541	1.06	0.594	2.65	1.7932e-08	1.13	0.4016	1	0.9736	3.03	1.6963e-09	1.02	0.8899	0.93	0.6998
gamma-glutamylvaline	0.68	0.0068	1.09	0.6096	1.2	0.1794	1.41	0.0152	1.1	0.5227	0.92	0.5068	1.1	0.5874	1.16	0.2972	1.3	0.0651
alanylphenylalanine	1.12	0.395	0.73	0.0087	1.02	0.9001	1.34	0.0312	1.18	0.3337	1.48	0.011	1.07	0.6408	0.97	0.7207	1	1
asparagylleucine	0.99	0.896	1.01	0.9206	0.89	0.107	1.35	0.0001	1.06	0.4025	1.06	0.4143	1.02	0.7948	1.14	0.0716	1.02	0.8169
aspartylphenylalanine	0.96	0.8463	0.83	0.0927	1.1	0.3985	1.18	0.1113	0.91	0.3959	0.96	0.7511	1.01	0.8175	1.01	0.9588	1.01	0.9321
glycylisoleucine	1.31	0.0587	1.15	0.3769	0.95	0.7286	1.23	0.1479	1.07	0.6599	1.1	0.5686	1.17	0.2249	1.1	0.5602	1.11	0.415
glycylleucine	0.94	0.4573	0.78	0.0059	0.89	0.1521	1.15	0.1063	1	0.986	0.97	0.7	1.19	0.0511	1.05	0.6174	0.87	0.1241
glycylvaline	0.82	0.0381	0.99	0.9276	0.88	0.1882	0.97	0.7194	1.08	0.5269	0.95	0.489	0.86	0.1143	0.91	0.3147	1.02	0.8128
isoleucylleucine	1.08	0.3808	0.93	0.3816	0.92	0.3202	1.48	4.5271e-05	1.03	0.7249	1.07	0.4749	1.12	0.2043	1.03	0.7694	0.93	0.448
valylvaline	0.84	0.0146	0.99	0.885	1.05	0.5722	1.08	0.3345	1.05	0.5268	1.07	0.4238	1.07	0.3793	1.11	0.1638	1.02	0.8415
leucylleucine	1.03	0.6422	0.91	0.1903	0.88	0.0586	1.35	0.0001	0.96	0.5735	1.03	0.809	1.01	0.9164	0.96	0.5274	0.89	0.0901
leucylglycine	0.93	0.5015	1.11	0.2038	0.95	0.5484	1.17	0.0433	1.05	0.5286	1.01	0.9128	0.92	0.3378	1.07	0.3966	1.09	0.2745
valylalanine	1.15	0.0783	0.98	0.6352	0.97	0.627	1.44	3.5462e-05	1.05	0.532	1.09	0.2662	1.11	0.1748	1.11	0.1643	0.97	0.6706
arginylleucine	0.91	0.4039	0.88	0.1753	0.87	0.1646	1.45	0.0003	1.08	0.4297	1.07	0.4294	1.16	0.0925	1.1	0.3784	0.9	0.2613
isoleucylglutamate	1.13	0.1889	1.1	0.2974	1.36	0.0018	1.24	0.0252	1.04	0.725	1.21	0.045	1.2	0.0745	1.35	0.0027	1.33	0.0036
isoleucylglycine	0.86	0.0883	1.14	0.1268	0.94	0.5077	1.04	0.5162	1.04	0.6317	1.07	0.3842	0.79	0.009	1.09	0.3479	1.09	0.2429
isoleucylthreonine	0.92	0.2742	1.02	0.8281	0.98	0.8728	1.59	2.9035e-06	0.99	0.8257	1.07	0.4438	1.17	0.0673	1.03	0.7191	1.05	0.5111
threonylphenylalanine	0.99	0.9697	0.91	0.4368	0.81	0.1079	1.29	0.0605	1.02	0.9299	0.99	0.8814	1.02	0.9078	1	0.9511	0.84	0.196
aspartylleucine	0.85	0.0324	0.93	0.3237	1	0.973	1.19	0.0195	1.06	0.5211	1.04	0.5854	1.01	0.8152	1.11	0.1752	0.93	0.3518
histidylleucine	0.92	0.2188	0.98	0.8933	0.86	0.0516	1.3	0.001	1.07	0.3097	0.99	0.9015	0.96	0.5268	1.11	0.1281	0.88	0.1041
isoleucylalanine	1.07	0.3809	0.92	0.2946	0.91	0.1782	1.21	0.0158	0.97	0.7145	1.01	0.9377	0.81	0.0072	1.05	0.4728	0.97	0.6297
isoleucylvaline	0.89	0.2843	1.08	0.4428	0.87	0.2059	1.07	0.5838	1.02	0.8397	0.85	0.1466	0.93	0.446	1.1	0.3896	0.88	0.2095
leucylalanine	1.1	0.1085	1.03	0.5651	0.82	0.001	1.28	9.0403e-05	1.08	0.1989	0.95	0.3838	0.96	0.4053	1.1	0.1078	0.87	0.0198
leucylglutamate	1	0.951	0.98	0.6654	0.97	0.656	1.12	0.0709	1.04	0.557	1.04	0.5357	0.97	0.557	1.12	0.0802	1	0.9811
leucylphenylalanine	1.1	0.2696	0.93	0.358	0.82	0.0275	1.51	1.6029e-05	1.03	0.801	1.04	0.6183	1.07	0.3862	1.06	0.5381	0.93	0.4472
leucylserine	1.11	0.2952	1.01	0.9302	0.96	0.7637	1.15	0.1745	1.01	0.9654	0.95	0.6211	1.03	0.7558	1.05	0.7683	1.01	0.9138
valylglutamate	1.02	0.8066	1.1	0.2422	0.97	0.6426	1.06	0.3823	1.07	0.3885	1.08	0.2831	1.06	0.3984	1.14	0.0908	1.04	0.6041
lysylleucine	0.9	0.0785	0.95	0.3498	0.84	0.0048	1.1	0.0895	1.06	0.3389	0.96	0.4983	0.99	0.8526	1.09	0.1279	0.9	0.058
serylisoleucine*	0.91	0.5038	1.26	0.2118	1.07	0.5551	1.05	0.9211	1.13	0.5479	0.99	0.8954	1.1	0.63	1.29	0.1543	1.03	0.6493
serylleucine	0.93	0.2122	0.98	0.689	0.9	0.0904	1.15	0.0354	1.11	0.1327	1.03	0.6711	0.99	0.9038	1.2	0.006	0.92	0.2153
serylphenyalanine	0.85	0.0946	0.8	0.0222	0.97	0.789	1.27	0.0144	1.08	0.4226	1.22	0.0568	0.98	0.8605	1.04	0.6619	0.98	0.7917
threonylleucine	0.97	0.5695	1.02	0.7817	0.88	0.0464	1.34	4.9538e-05	1.02	0.7855	0.98	0.749	1.07	0.3269	1.1	0.142	0.89	0.094
tyrosylleucine	0.9	0.2841	0.94	0.4237	0.85	0.0871	1.29	0.008	0.99	0.8781	1.1	0.3445	0.94	0.4301	0.99	0.9573	0.93	0.4395
valylisoleucine	0.99	0.8492	1.01	0.9505	0.88	0.1331	1.16	0.0888	0.96	0.544	1.02	0.7453	1	0.9924	1.1	0.2667	0.97	0.7991
valylleucine	1.04	0.6376	0.9	0.1535	0.93	0.3089	1.54	1.7409e-06	1.01	0.9596	1.1	0.1985	1.09	0.2673	1.01	0.8603	1	0.9791
leucylthreonine	0.89	0.1309	0.96	0.5946	1	0.9853	1.16	0.0315	0.87	0.0495	1.07	0.3611	1.05	0.4373	0.98	0.7894	1.14	0.0786
threonylvaline	0.99	0.9453	0.92	0.4698	1.02	0.9108	1.08	0.4475	1.04	0.8453	0.96	0.7647	1.1	0.4616	1.05	0.7788	0.97	0.8177
glutamine-leucine	0.96	0.6293	0.97	0.6525	0.91	0.2284	1.49	2.7228e-05	1.2	0.036	1.03	0.7156	1.08	0.3574	1.22	0.026	0.93	0.3427
Hormone metabolism
abscisate	0.89	0.3359	1.1	0.756	1.18	0.1214	0.76	0.0235	1.21	0.143	1.22	0.0843	0.85	0.1794	1.34	0.0213	0.89	0.4521
gibberellate	1.05	0.6446	1	1	1	1	1.54	0.2551	1	1	1	1	7.33	2.919e-08	1	1	1	1
Secondary metabolism
galactarate (mucic acid)	0.95	0.3709	1.19	0.0072	1.08	0.2288	1.25	0.001	1.27	0.0006	1	0.9864	1.15	0.0268	1.18	0.0105	1.08	0.2243
catechin	0.96	0.717	1.29	0.0304	1.12	0.3805	0.78	0.0378	1.01	0.9205	1.17	0.1797	0.92	0.5095	1.07	0.5274	1.27	0.0341
dihydrokaempferol	1.11	0.2202	0.94	0.4193	0.72	0.0002	1.06	0.4978	1.07	0.3967	1.18	0.0475	0.94	0.4752	0.98	0.811	1.02	0.9035
epicatechin	1.11	0.0049	1.11	0.0034	1.02	0.5614	1.01	0.6671	1.01	0.7647	0.99	0.6779	1.06	0.0914	1.06	0.073	1.01	0.8571
dihydroquercetin	0.82	0.0854	0.56	1.076e-05	0.76	0.0219	1.21	0.1183	0.96	0.7502	1.24	0.1077	0.99	0.9335	0.91	0.4455	1.27	0.039
isorhamnetin	1.2	0.0455	1	1	1	1	0.81	0.0126	1	1	1	1	0.95	0.6354	1	1	1	1
procyanidin B2	1.27	0.0002	1.19	0.0058	1.12	0.0618	1.07	0.258	0.99	0.9407	1.07	0.2621	1.08	0.1762	1.07	0.2415	1.1	0.1073
quercetin	0.91	0.691	1.86	0.0129	1.16	0.456	1.92	0.003	1.09	0.7156	1.03	0.7761	1.1	0.705	1.11	0.6798	0.97	0.9837
quercetin-3-o-glucoside	1.33	0.0031	1.62	5.4133e-06	1.16	0.1057	1.19	0.0651	1.03	0.783	1.05	0.5555	0.83	0.0485	1.01	0.8945	0.81	0.0269
rutin	1.48	2.0564e-10	1.18	0.0011	1.03	0.5836	2.07	0	1.04	0.3466	0.93	0.1499	1.34	1.2643e-07	1.08	0.1013	0.95	0.2734
chrysoeriol	1.15	0.1573	1.08	0.4917	0.79	0.0565	0.88	0.2795	1.06	0.5783	0.88	0.3073	0.96	0.7708	1.19	0.1061	1	0.7759
3,4-dimethoxycinnamic acid	1.01	0.9201	0.46	0.4116	0.99	0.9961	0.81	0.7685	0.72	0.7175	1.28	0.9079	0.95	0.9255	0.77	0.7323	0.42	0.5249
chlorogenate	1.26	0.3827	0.74	0.1359	0.62	0.0799	0.42	0.0126	0.94	0.8342	0.59	0.0522	0.5	0.0508	1.11	0.6859	0.48	0.009
cinnamate	1	1	1.37	0.0004	0.66	2.9311e-05	1	1	1.23	0.0104	1.26	0.0035	1	1	1.05	0.4708	1	0.7817
4-hydroxycinnamate	1.09	0.3107	1.2	0.1569	0.65	0.0025	1.18	0.1237	1.23	0.0932	0.84	0.1935	1.15	0.134	1.16	0.2311	0.9	0.418
ferulate	1.29	0.0025	0.88	0.125	0.76	0.0019	1.06	0.382	1.03	0.6284	0.87	0.0991	0.9	0.2578	1.28	0.0034	0.91	0.2737
sinapate	1.44	7.3465e-07	1.13	0.0573	0.96	0.5059	2.01	3.74e-13	1.03	0.6788	1.18	0.0163	1.27	0.0003	1.1	0.1421	1.1	0.1618
cryptochlorogenic acid	1.19	0.6297	0.9	0.5073	0.58	0.0597	0.3	0.0005	1	0.9899	0.59	0.0623	0.47	0.0369	1.25	0.4105	0.39	0.0014
lariciresinol	0.85	0.0004	1	1	1	1	0.85	0.0004	1	1	1	1	0.85	0.0004	1	1	1	1
coumaroylquinate	0.96	0.6198	1	0.9821	1.17	0.153	0.86	0.2242	1.19	0.0979	0.79	0.0269	0.8	0.0649	1.09	0.4068	0.95	0.6128
procyanidin trimer	1.35	0.0006	1.29	0.0034	1.12	0.1509	1.06	0.4935	0.98	0.8315	1.11	0.2699	1.12	0.1798	1.1	0.2226	1.09	0.2457
cinnamtannin D-1	1.07	0.7682	1.89	0.0081	1.75	0.023	0.92	0.7501	1.17	0.451	1.76	0.0268	0.98	0.9313	1.18	0.5707	1.7	0.0344
